# Supplementary material for: Electronic Structure Methods for Simulating Flavin’s Spectroscopy and Photophysics: Comparison of Multi-reference, TD-DFT, and Single-Reference Wave Function Methods
Source: PubMed Central journal article supplement (PMC11317985; doi:10.1021/acs.jpcb.4c03748), 2024-07-29
Supplement: jp4c03748_si_002.pdf [file jp4c03748_si_002.pdf]

**Supporting Information for:**

**Electronic Structure Methods for Simulating Flavin's Spectroscopy and Photophysics:  
Comparison of Multi-Reference, TD-DFT, and Single-Reference Wave Function Methods**

Mohammad Pabel Kabir,<sup>1</sup> Paulami Ghosh,<sup>1</sup> Samer Gozem<sup>1,\*</sup>

<sup>1</sup>Department of Chemistry, Georgia State University, Atlanta, GA 30302, United States.

a. FI

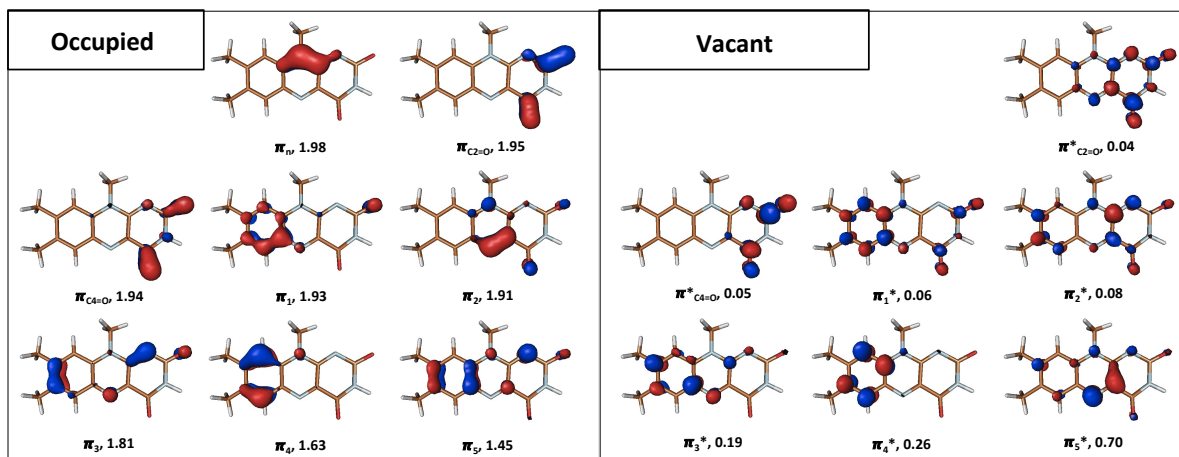

b. FIH<sup>-</sup>

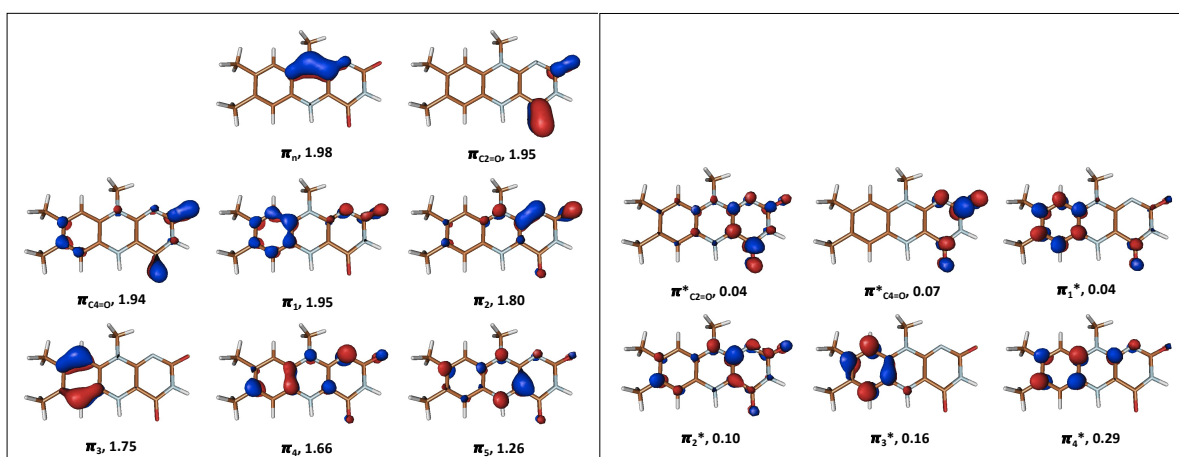

c. FI<sup>-</sup>

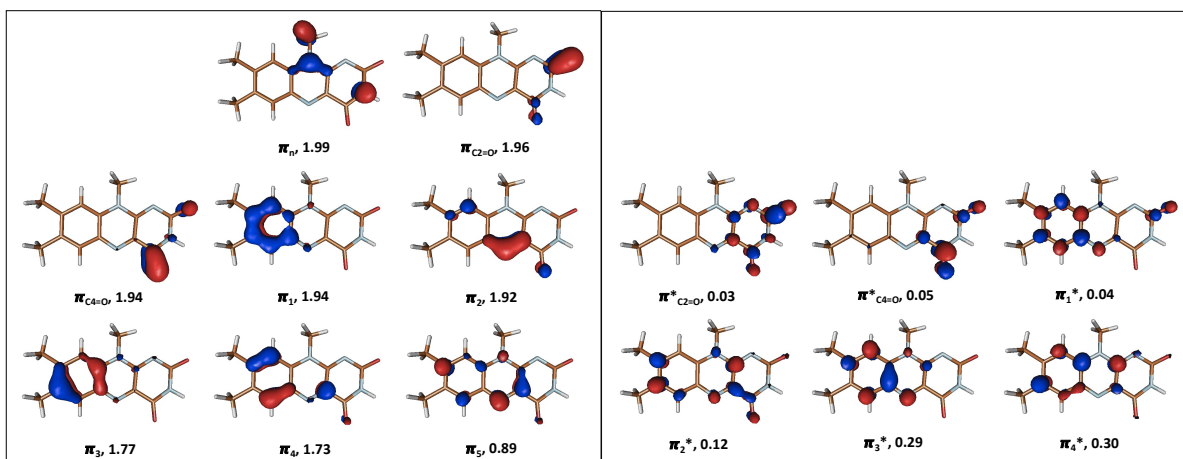

d. FIH<sub>2</sub>

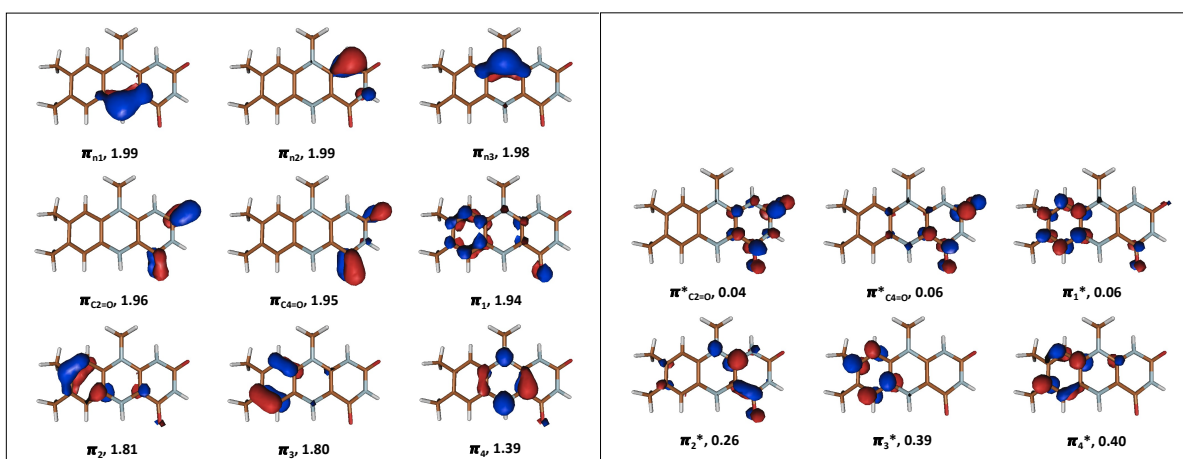

e. FIH<sup>-</sup>

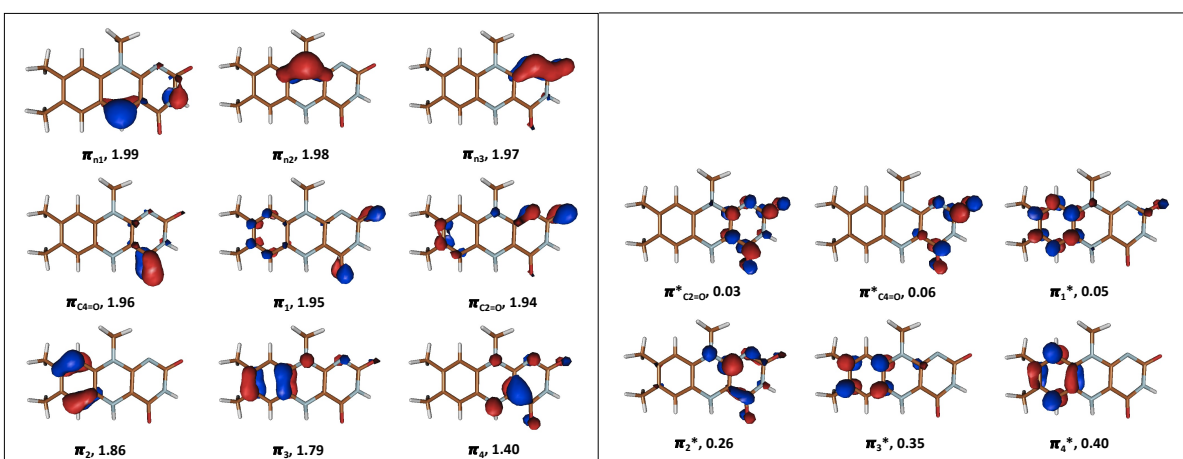

**Figure S1.** Occupied (left) and vacant (right) orbitals used as a starting point for the active space of flavin in each of five redox and protonation states. **a.** oxidized quinone (FI), **b.** neutral semiquinone radical (FIH<sup>•</sup>), **c.** anionic semiquinone radical (FI<sup>-</sup>), **d.** neutral hydroquinone (FIH<sub>2</sub>), and **e.** anionic hydroquinone (FIH<sup>-</sup>).

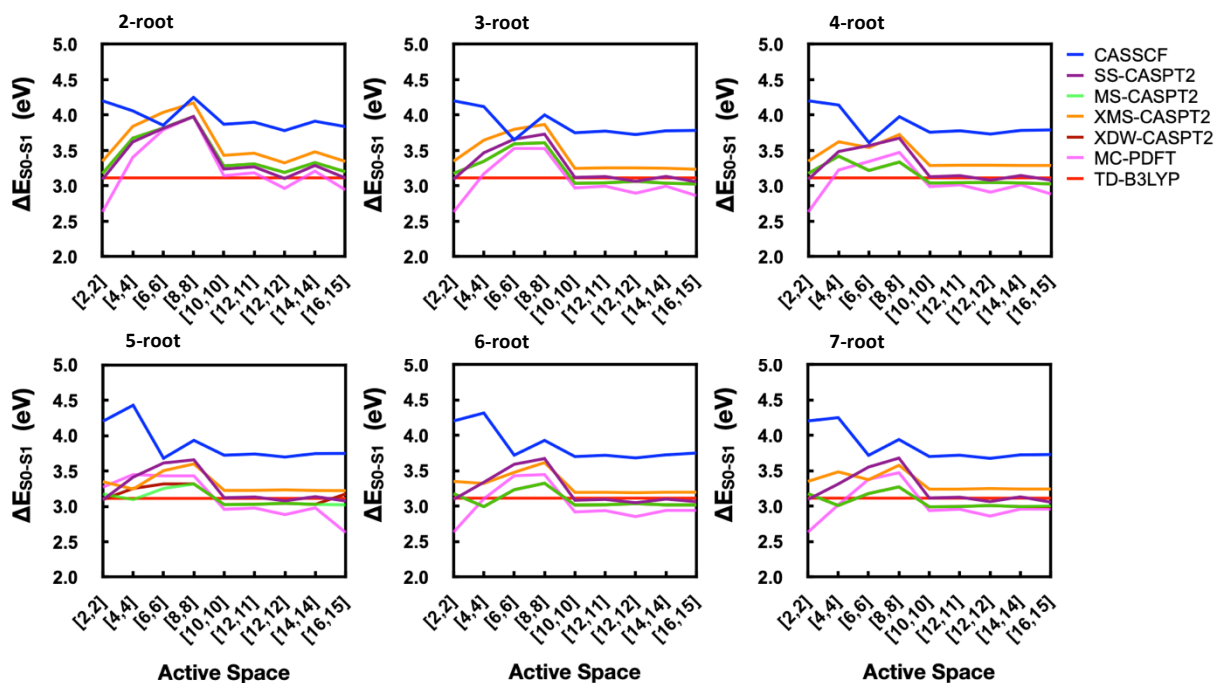

**Figure S2.** MR-PT2 and CASSCF  $S_1$  excitation energies as a function of active space [number of electrons, number of orbitals] with 2-root averaging, 3-root state averaging, 4-root state averaging, 5-root state averaging, 6-root state averaging, and 7-root state averaging for LF in the oxidized form. The TD-B3LYP excitation energy is shown as a red line for reference.
